# Supplementary material for: Synthesis, characterization, micellization and metal coordination polymerization of pentacyanoferrate-coordinated block copolymers for monodispersed soluble Prussian blue nanospheres
Source: Royal Society of Chemistry journal article supplement (doi:10.1039/c2py20379k), 2012-01-01
Supplement: c2py20379k.pdf [file c2py20379k.pdf]

Synthesis, characterization, micellization and metal  
coordination polymerization of pentacyanoferrate-  
coordinated block copolymers for monodispersed  
soluble Prussian blue nanospheres

*Yibo Liu and Xiaosong Wang\**

**Department of Chemistry and Waterloo Institute of Nanotechnology (WIN)  
University of Waterloo, Waterloo, Canada, N2L 3G1**

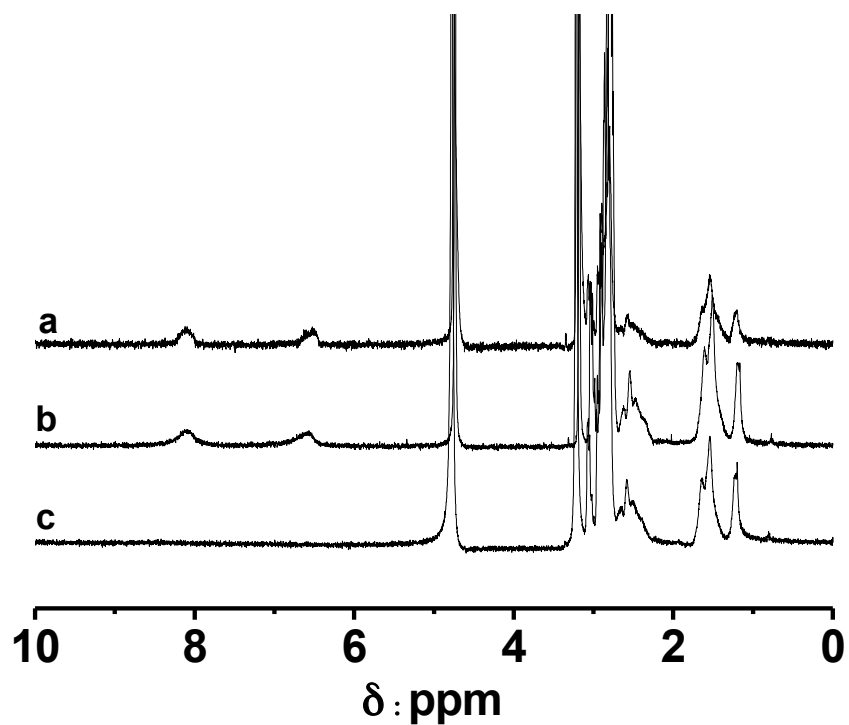

**Figure S1.** The <sup>1</sup>H NMR spectra of (a) P4VP-*b*-PDMA, (b, c) the solution of P4VP-*b*-PDMA in the presence of FeCl<sub>3</sub> in CD<sub>3</sub>OD (b: pyridyl groups: Fe<sup>3+</sup> = 10: 1 by mole; c: pyridyl groups : Fe<sup>3+</sup> = 2: 1 by mole).

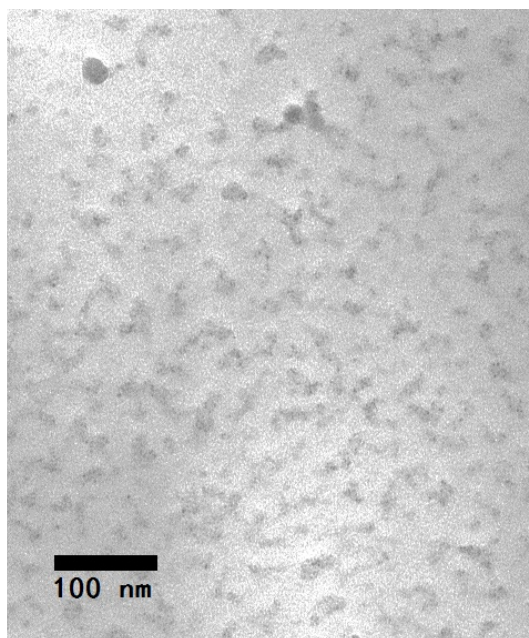

**Figure S2.** TEM image of PB prepared from metal coordination polymerization of P(4VPFe-co-4VP)-*b*-PDMA with Fe<sup>3+</sup> in H<sub>2</sub>O.

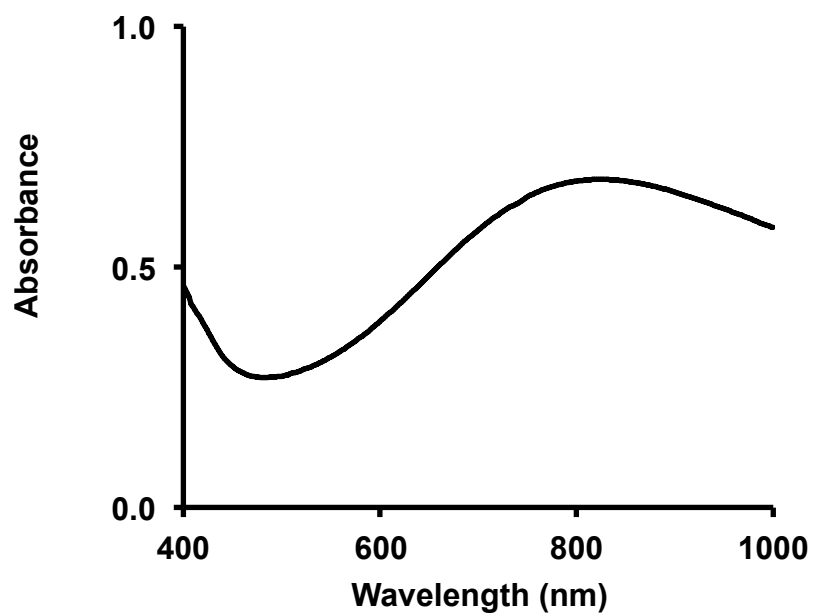

**Figure S3.** UV-Vis spectrum of PB NPs in H<sub>2</sub>O/EtOH (1: 50 v/v).

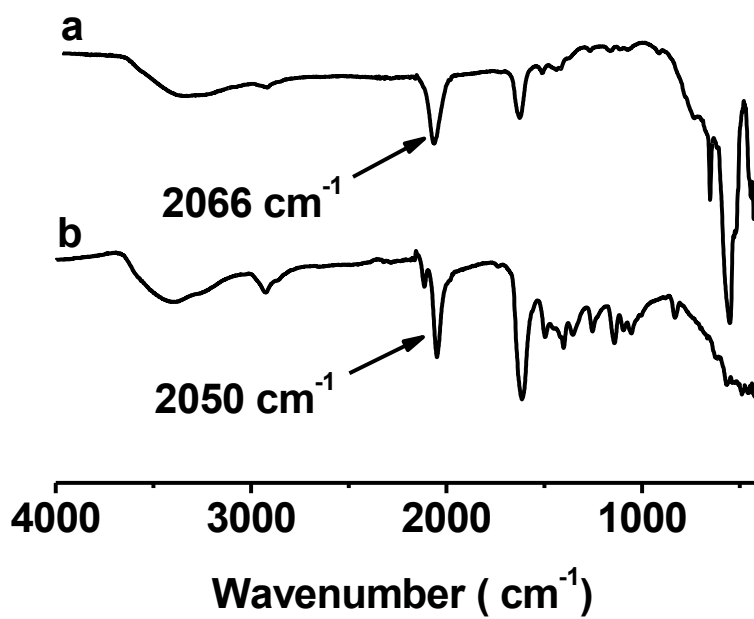

**Figure S4.** FT-IR spectra of (a) PB NPs and (b) P(4VPFe-*co*-4VP)-*b*-PDMA.

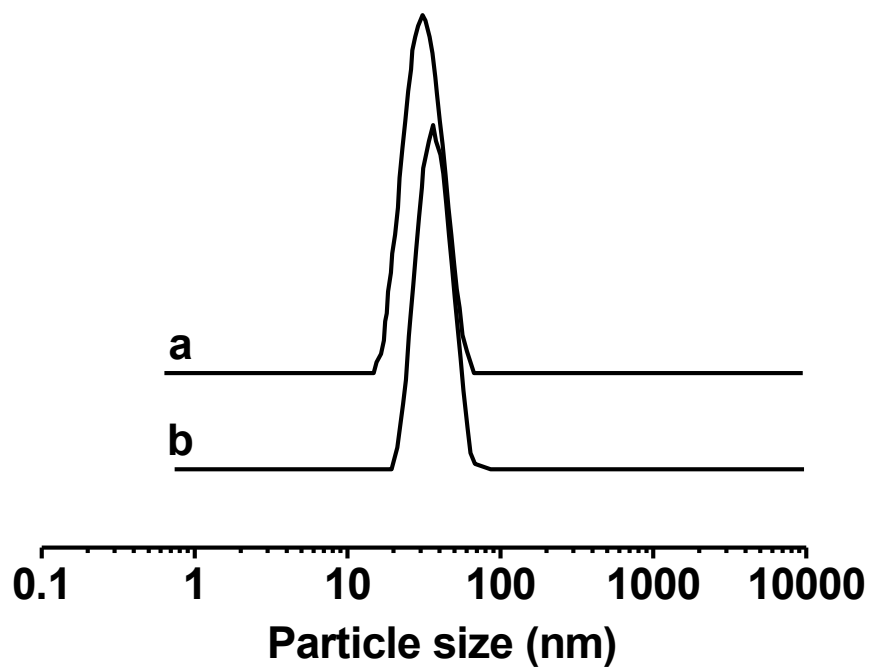

**Figure S5.** DLS data of (a) micelles self-assembled from P(4VPFe-*co*-4VP)-*b*-PDMA and (b) PB NPs with the Fe<sup>3+</sup> to pyridyl group ratio of 1:1 by mole in H<sub>2</sub>O/EtOH (1: 50 v/v).

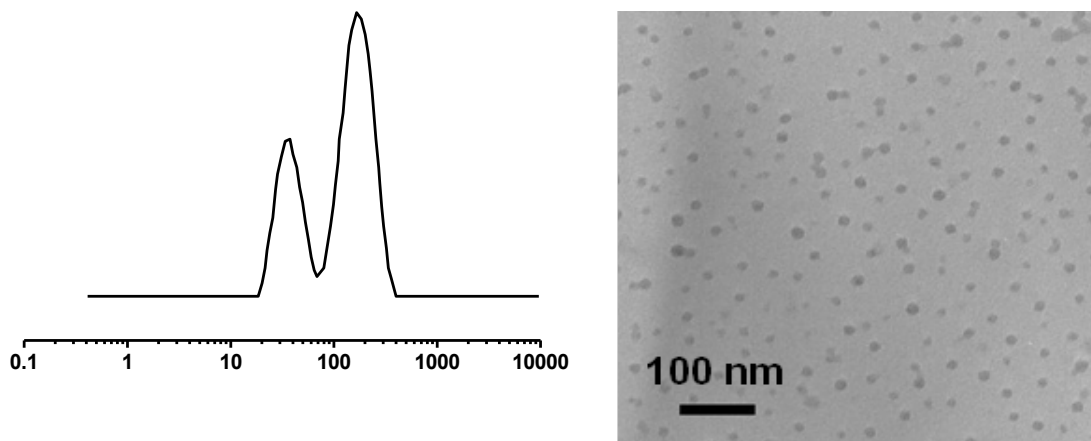

**Figure S6.** DLS data and TEM image of PB NPs prepared from metal coordination polymerization of P(4VPFe-*co*-4VP)-*b*-PDMA with Fe<sup>3+</sup> in H<sub>2</sub>O/EtOH (1: 50 v/v) (pyridyl group to Fe<sup>3+</sup> ratio is 1: 5).

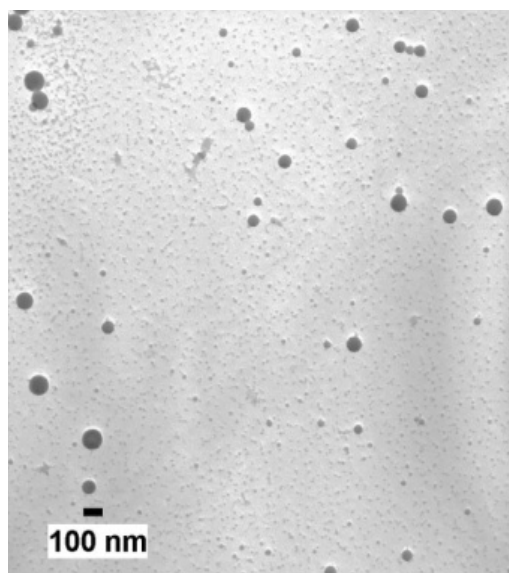

**Figure S7.** TEM image of PB NPs prepared from metal coordination polymerization of a higher concentration of P(4VPFe-*co*-4VP)-*b*-PDMA (2 mg/mL) with Fe<sup>3+</sup> in EtOH/H<sub>2</sub>O (Pyridyl groups to Fe<sup>3+</sup> ratio is 1:1).
